# Supplementary material
Source: PubMed Central journal article supplement (PMC8849582)

## SUPPLEMENTAL MATERIAL

**Supplemental Table 1. Overall survival of patients in chronic phase of MF (<10% blasts) stratified by bone marrow blast percentage**

| Blast % in bone marrow [BM] | N of patients / events | Median OS, months (range) |
|-----------------------------|------------------------|---------------------------|
| 0                           | 282 / 131              | 65 (54-76)                |
| 1                           | 438 / 192              | 63 (4.2-55)               |
| 2                           | 295 / 131              | 49 (3-43)                 |
| 3                           | 142 / 90               | 43 (6.7-27)               |
| 4                           | 98 / 54                | 42 (13-22)                |
| 5                           | 31 / 17                | 30 (4.8-25)               |
| 6                           | 26 / 21                | 21 (8.4-30)               |
| 7                           | 13 / 9                 | 22 (5.3-11)               |
| 8                           | 23 / 20                | 15 (3-8.7)                |
| 9                           | 8 / 7                  | 6 (3.5-15)                |

**Supplemental Table 2. Abnormal Karyotype stratified by blast percentage (patients with available cytogenetics at presentation)**

| Groups / N of tested pts                          | CP, n=611       | CP-1, n=467     | CP2, n=78      | AP, n=46       | p-value**        |
|---------------------------------------------------|-----------------|-----------------|----------------|----------------|------------------|
| Karyotype characteristics                         |                 |                 |                |                |                  |
| <b>Abnormal (Abn), N (%)</b>                      | <b>210 (32)</b> | <b>209 (40)</b> | <b>54 (69)</b> | <b>34 (64)</b> | <b>&lt;0.001</b> |
| <b>Single Abn, N (%)</b>                          | <b>132 (22)</b> | <b>140 (30)</b> | <b>35 (45)</b> | <b>16 (35)</b> | <b>0.01</b>      |
| Deletion 13q, N (%)                               | 21 (3)          | 24 (5)          | 8 (10)         | 2 (4)          | 0.101            |
| Deletion 20q, N (%)                               | 56 (9)          | 44 (9)          | 9 (12)         | 3 (7)          | 0.908            |
| Trisomy 8, N (%)                                  | 16 (3)          | 15 (3)          | 3 (4)          | 3 (7)          | 0.436            |
| Trisomy 9, N (%)                                  | 5 (1)           | 3 (1)           | 0              | 0              | NA               |
| Deletion 5/5q, 7/7q, 12p-, 11q23, i17q N (%)      | 9 (1.5)         | 5 (1)           | 5 (6)          | 1 (2)          | 0.456            |
| Other single*, N (%)                              | 26 (4)          | 49 (11)         | 10 (13)        | 7 (15)         | 0.236            |
| Two Abn, N (%)                                    | 51 (8)          | 38 (8)          | 10 (13)        | 9 (20)         | 0.93             |
| Two Abn incl 5/5q, 7/7q, 12p-, 11q23, i17q, N (%) | 8 (1)           | 5 (1)           | 1 (1)          | 1 (2)          | 0.78             |
| Abn 2, Monosomal                                  | 0               | 3 (1)           | 0              | 1 (2)          | 0.48             |
| <b>CK, monosomal</b>                              | <b>7 (1)</b>    | <b>17 (4)</b>   | <b>6 (8)</b>   | <b>5 (11)</b>  | <b>&lt;0.001</b> |
| <b>Complex (≥3 Abn), N (%)</b>                    | <b>27 (4)</b>   | <b>31 (7)</b>   | <b>9 (12)</b>  | <b>9 (20)</b>  | <b>&lt;0.001</b> |

\* other single: combinations of: INV, DER and TRANSL. of 1, 3, 6, 8, 9, 12, 13, 15, 18 and Y; trisomy of 1, 8, 9, 21, 13; ADD of 21, 2; DEL 6p, 8p, 1p, 13q, 20q, 12q, 11p

\*\* p-value CP2 vs AP: 0.68 for abnormal CG, 0.34 for single Abn; 0.29 for CK (the difference remains between CP/CP1 vs CP-2/AP); **BOLD**, statistically significant results

**Supplemental Table 3. Demographics and clinical characteristics of patients with 5-9% and 10% BM blasts**

| Characteristics                                | BM 5-9%, n=101 | BM 10%, N=56  | p-value     |
|------------------------------------------------|----------------|---------------|-------------|
| Males, N (%)                                   | 71 (70)        | 40            | 0.39        |
| Median age, years (range)                      | 66.8 (32-86)   | 66 (28-81)    | 0.179       |
| Age > 65 years, N (%)                          | 64 (63)        | 30            | 0.06        |
| Median hemoglobin g/dL, (range)                | 10 (4.6-16)    | 9.2 (5.8-15)  | 0.06        |
| Hemoglobin < 10 g/dL, n (%)                    | 53 (52)        | 36            | 0.07        |
| Median WBC x10 <sup>9</sup> /L, (range)        | 12.25 (2-361)  | 12.6 (1-76)   | 0.69        |
| WBC > 25 x10 <sup>9</sup> /L, N (%)            | 34 (33)        | 11            | 0.14        |
| Median platelets x 10 <sup>9</sup> /L, (range) | 181 (6-886)    | 146.5 (3-764) | <b>0.31</b> |
| Platelets < 100 x10 <sup>9</sup> /L, N (%)     | 40 (40)        | 22            | 0.73        |
| Transfusion dependency, N (%)                  | 27 (27)        | 21            | 0.103       |
| BM fibrosis, grade ≥2, N (%)                   | 95 (95)        | 50            | 0.104       |
| Splenomegaly, > 5 cm BCM, N (%)                | 68 (68)        | 30            | 0.38        |
| Symptoms, N (%)                                | 89 (88)        | 52            | 0.64        |
| diploid karyotype, N (%)                       | 46 (46)        | 19            | 0.72        |
| JAK2 positive, N (%)                           | 53 / 81        | 29/46         | 1.00        |
| MPL and CALR                                   | 1 / 11         | 0/5           |             |
| HMR                                            | 16 / 43 (37)   | 9 / 31 (29)   |             |
| DIPSS risk, N (%) -- low                       | 3              | 1             | 0.91        |
| Int-1                                          | 44             | 19            |             |
| Int-2                                          | 35             | 18            |             |
| high                                           | 28             | 18            |             |

**Supplemental Table 4. Treatment distribution**

| <b>Groups // treatment characteristics</b>     | <b>CP, 720</b> | <b>CP1, 535</b> | <b>CP-2, 101</b> | <b>AP, 56</b> |
|------------------------------------------------|----------------|-----------------|------------------|---------------|
| RUX, N (%)                                     | 255 (35)       | 232 (43)        | 40 (40)          | 13 (23)       |
| Single RUX                                     | 183 (72)       | 172 (74)        | 6 (15)           | 1 (8)         |
| RUX & HMA (AZA / DAC)*                         | 27 (11)        | 15 (6)          | 12 (30)          | 7 (54)        |
| RUX & IMiDs (LEN / THAL)*                      | 33 (13)        | 29 (12.5)       | 18 (45)          | 5 (38)        |
| RUX & others (HDAC / JAKi/ etc)                | 12 (5)         | 16 (7)          | 4 (10)           | --            |
| RUX treatment duration, median (range), months |                |                 |                  |               |
| ALL regimens                                   | 15 (1-110)     | 14 (2-97)       | 19 (2-111)       | 6 (3-21)      |
| Single RUX, clinical trials                    | 37 (4-105)     | 24 (4-104)      | 31 (2-111)       | --            |
| RUX in combination, clinical trials            | 15.5 (3-67)    | 9.5 (5-71)      | 16 (2-32)        | --            |

RUX = ruxolitinib

**Supplemental Table 5. Overall survival in all patients based on BM blast percentage, stratified by the use of ruxolitinib (uncensored and censored for SCT)**

|             | All pts (N / events) | Overall survival, uncensored for SCT | OS, censored for SCT |
|-------------|----------------------|--------------------------------------|----------------------|
| <b>CP</b>   |                      |                                      |                      |
| With RUX    | 455 / 229            | 72 (60-84)                           | 78 (64-92)           |
| Without RUX | 255 / 94             | 58 (48-68)                           | 59 (49-69)           |
| <b>CP-1</b> |                      |                                      |                      |
| With RUX    | 232 / 100            | 58 (45-71)                           | 60 (46-74)           |
| Without RUX | 303 / 175            | 34 (25-43)                           | 34 (23-45)           |
| <b>CP-2</b> |                      |                                      |                      |
| With RUX    | 61 / 53              | 47 (37-57)                           | 47 (38-56)           |
| Without RUX | 40 / 21              | 16 (10-22)                           | 17 (13-21)           |
| <b>AP</b>   |                      |                                      |                      |
| With RUX    | 13 / 9               | 10 (1-33)                            | --                   |
| Without RUX | 43 / 29              | 14 (6-21)                            | --                   |

Survival for AP after SCT was not calculated due to small numbers and limited SCT use; RUX = ruxolitinib

**Supplemental Table 6. Overall survival in patients referred after the year of 2000 stratified by bone marrow blast percentage and the use of ruxolitinib, uncensored and censored for SCT**

| <b>1220&gt; y 2000</b> | <b>MF, N (all / events)</b> | <b>OS, uncensored</b> | <b>MF, N (all / events)</b> | <b>OS, censored for SCT</b> |
|------------------------|-----------------------------|-----------------------|-----------------------------|-----------------------------|
| <b>CP</b>              |                             |                       |                             |                             |
| With RUX               | 242 / 93                    | 72 (59-85)            | 241/85                      | 72 (59-85)                  |
| Without RUX            | 359 / 184                   | 64 (53-75)            | 359/167                     | 65 (53-77)                  |
| <b>CP-1</b>            |                             |                       |                             |                             |
| With RUX               | 259 / 158                   | 54 (42-66)            | 213/91                      | 34 (24-44)                  |
| Without RUX            | 213 / 99                    | 34 (26-43)            | 259/143                     | 58 (44-72)                  |
| <b>CP-2</b>            |                             |                       |                             |                             |
| With RUX               | 44 / 22                     | 48 (38-58)            | 44/20                       | 48 (37-59)                  |
| Without RUX            | 54 / 48                     | 15 (9-21)             | 54/42                       | 17 (11-23)                  |
| <b>AP</b>              |                             |                       |                             |                             |
| With RUX               | 12 / 7                      | 10 (0.3-33)           | 12/7                        | 10 (0.3-21)                 |
| Without RUX            | 37 / 28                     | 14 (6.5-22)           | 27/25                       | 19 (5.5-33)                 |

RUX = ruxolitinib, SCT, stem cell transplantation, all alive patients had > 3 months follow-up since presentation; p-values comparing patients with and without RUX within groups (uncensored for SCT): CP, p = 0.03; CP-1, p < 0.001, CP-2, p < 0.001; AP, p = 0.17

**Supplemental Table 7. Overall survival in newly diagnosed patients based on blast percentage and the use of ruxolitinib, censored and uncensored for SCT**

|             | <b>NEW, N (all / events)</b> | <b>OS, uncensored</b> | <b>NEW, N (all / events)</b> | <b>OS, censored for SCT</b> |
|-------------|------------------------------|-----------------------|------------------------------|-----------------------------|
| <b>CP</b>   |                              |                       |                              |                             |
| With RUX    | 121/42                       | 86 (46-126)           | 121/38                       | 86 (56-116)                 |
| Without RUX | 276/129                      | 67 (56-78)            | 276/114                      | 69 (59-79)                  |
| <b>CP-1</b> |                              |                       |                              |                             |
| With RUX    | 112/46                       | 85 (60-109)           | 112/42                       | 86 (59-113)                 |
| Without RUX | 169/88                       | 46 (37-55)            | 169/77                       | 49 (38-60)                  |
| <b>CP-2</b> |                              |                       |                              |                             |
| With RUX    | 30/25                        | 15 (9.7-20)           | 19/7                         | 57 (47-67)                  |
| Without RUX | 19/8                         | 57 (39-75)            | 30/22                        | 15 (8-22)                   |
| <b>AP</b>   |                              |                       |                              |                             |
| With RUX    | 5/1                          | NR                    | --                           | --                          |
| Without RUX | 23/14                        | 30 (1-60)             | --                           | --                          |

OS for AP censored for SCT was not calculated due to small numbers, RUX = ruxolitinib

CP-2 vs AP in new pts:  $p = 0.7$ ;

**Supplemental Figure 1. Kaplan Meier curve comparing overall survival of all groups stratified by ruxolitinib**

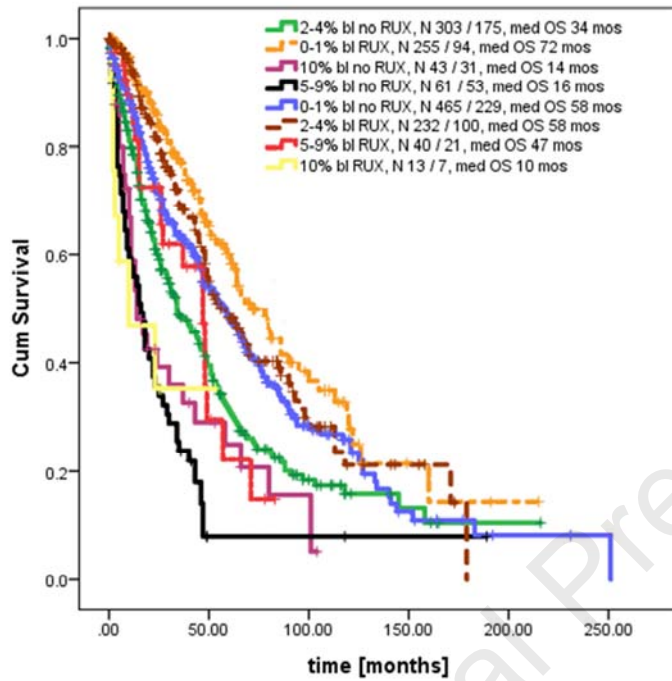



**Supplemental Figures 2 A-C. Kaplan Meier curves showing overall survival censored for stem cell transplantation: [2A] patients in CP with and without ruxolitinib; [2B] patients in CP-1 with and without ruxolitinib, [2C] patients in CP-2 with and without ruxolitinib**

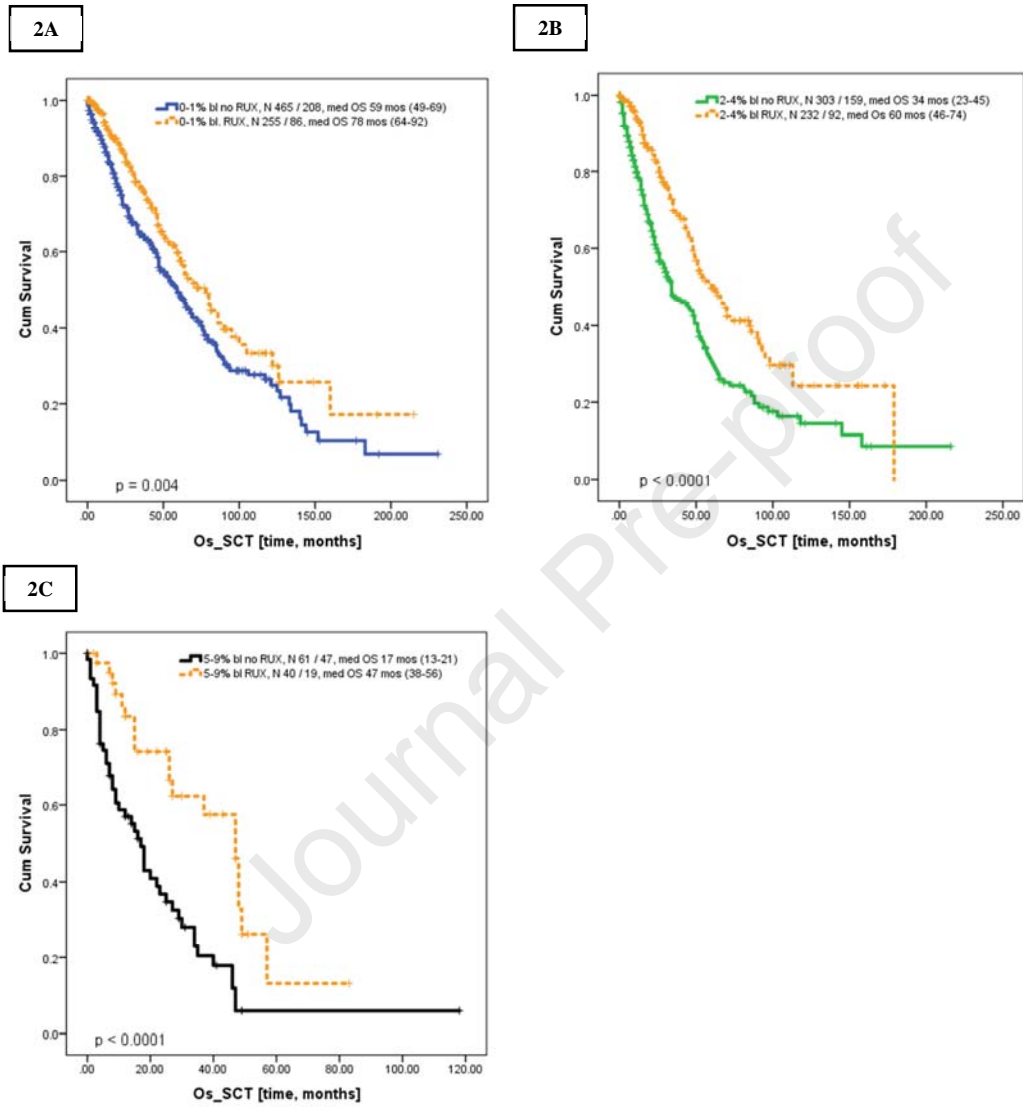

Supplement: NIHMS1660311-supplement-1.pdf [file NIHMS1660311-supplement-1.pdf]
